# Supplementary material
Source: PubMed Central journal article supplement (PMC8510853)
Supplement: NIHMS1621702-supplement-Supplementary_Table.pdf [file NIHMS1621702-supplement-Supplementary_Table.pdf]

**Supplementary Table:** Age and sex distributions.

| Age Group Window (in years) | Age Range (in years) | Total Number of Subjects | Number of Males | Number of Females |
|-----------------------------|----------------------|--------------------------|-----------------|-------------------|
| 6                           | 5 – 7                | 91                       | 41              | 50                |
| 7                           | 6 – 8                | 100                      | 44              | 56                |
| 8                           | 7 – 9                | 83                       | 36              | 47                |
| 9                           | 8 – 10               | 90                       | 38              | 52                |
| 10                          | 9 – 11               | 83                       | 33              | 50                |
| 11                          | 10 – 12              | 85                       | 35              | 50                |
| 12                          | 11 – 13              | 73                       | 37              | 36                |
| 13                          | 12 – 14              | 70                       | 39              | 31                |
| 14                          | 13 – 15              | 65                       | 36              | 29                |
| 15                          | 14 – 16              | 59                       | 30              | 29                |
| 16                          | 15 – 17              | 66                       | 31              | 35                |
| 17                          | 16 – 18              | 52                       | 25              | 27                |
